# Supplementary material for: Frontotemporal Lobar Degeneration Case with an N-Terminal TUBA4A Mutation Exhibits Reduced TUBA4A Levels in the Brain and TDP-43 Pathology
Source: MDPI journal article supplement (doi:10.3390/biom12030440), 2022-03-12
Supplement: s1 [file s1]

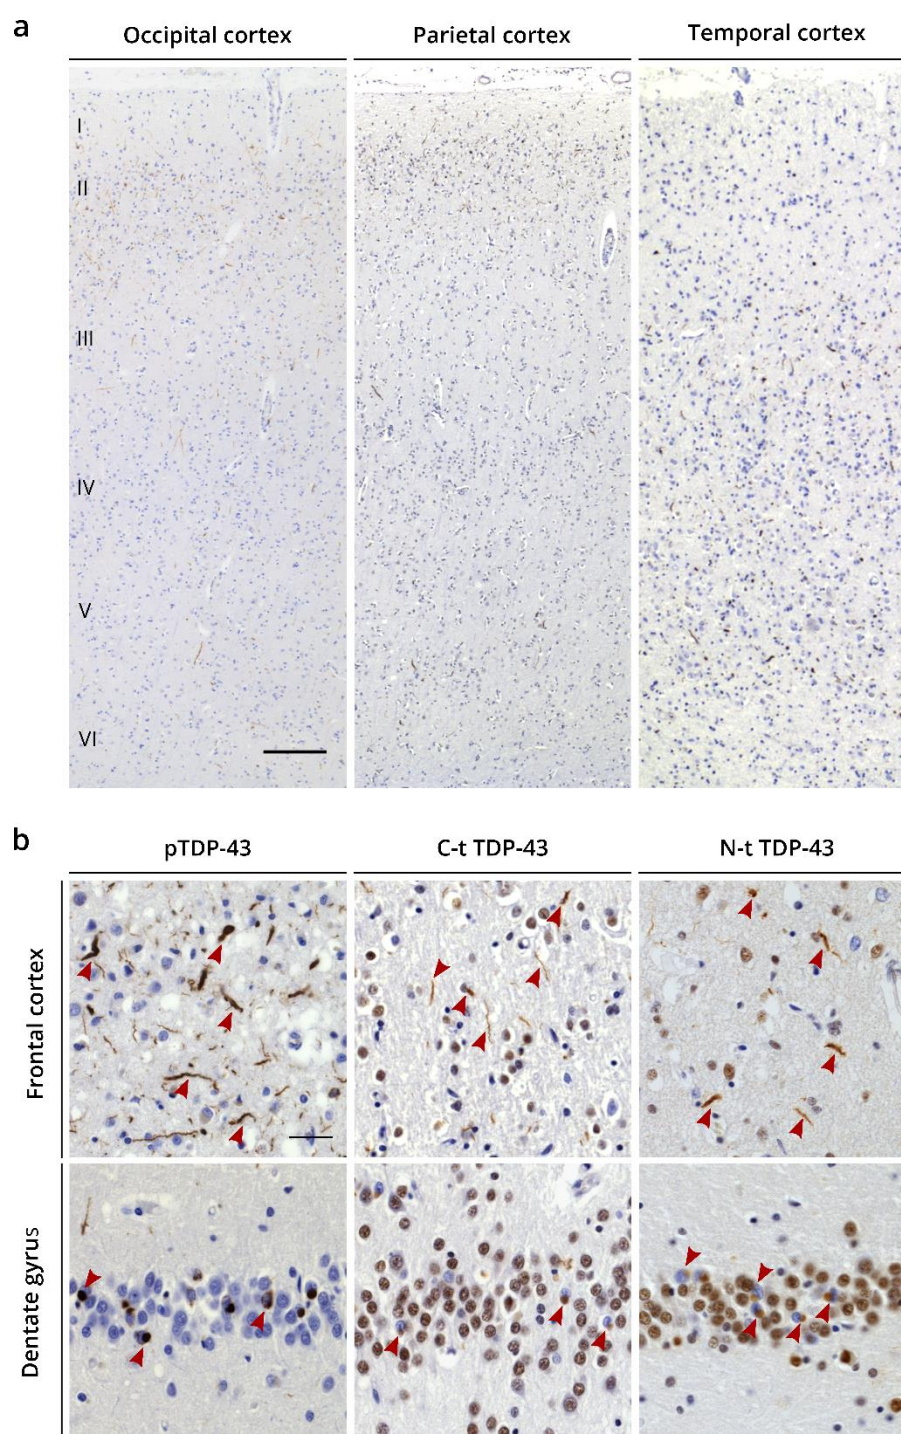

**Supplementary Figure S1. TDP-43 pathology in the FTLD-TDP case with an R64Gfs\*90 *TUBA4A* mutation.** (a) pTDP-43 pathology is spread throughout all layers of the occipital and parietal cortex and the temporal cortex of the R64Gfs\*90 *TUBA4A* mutation case. (b) pTDP-43 lesions in the dentate gyrus and frontal cortex (layer II) of the R64Gfs\*90 *TUBA4A* mutation case are immunopositive for N-t TDP-43 and C-t TDP-43 antibodies (arrowheads). Scale bars represent 200  $\mu\text{m}$  (a) and 15  $\mu\text{m}$  (b).

|     | Type A                                                                            | Type B                                                                            | Type C                                                                            | Type D                                                                            | Type E                                                                             | <i>TUBA4A</i><br>FTLD case                                                          |
|-----|-----------------------------------------------------------------------------------|-----------------------------------------------------------------------------------|-----------------------------------------------------------------------------------|-----------------------------------------------------------------------------------|------------------------------------------------------------------------------------|-------------------------------------------------------------------------------------|
| I   |  |  |  |  |  |  |
| II  |  |  |  |  |  |  |
| III |  |  |  |  |  |  |
| IV  |  |  |  |  |  |  |
| V   |  |  |  |  |  |  |
| VI  |  |  |  |  |  |  |
| WM  |  |  |  |  |  |  |

**Supplementary Figure S2. Schematic overview of the FTLD-TDP pathology pattern.** This scheme provides an overview of the FTLD-TDP types that have been described previously. The pattern of the R64Gfs\*90 *TUBA4A* mutation case fits best with FTLD-TDP Type C. Pathological lesions mainly consisting of dystrophic neurites were observed throughout all layers of the cortex and were absent in the white matter.

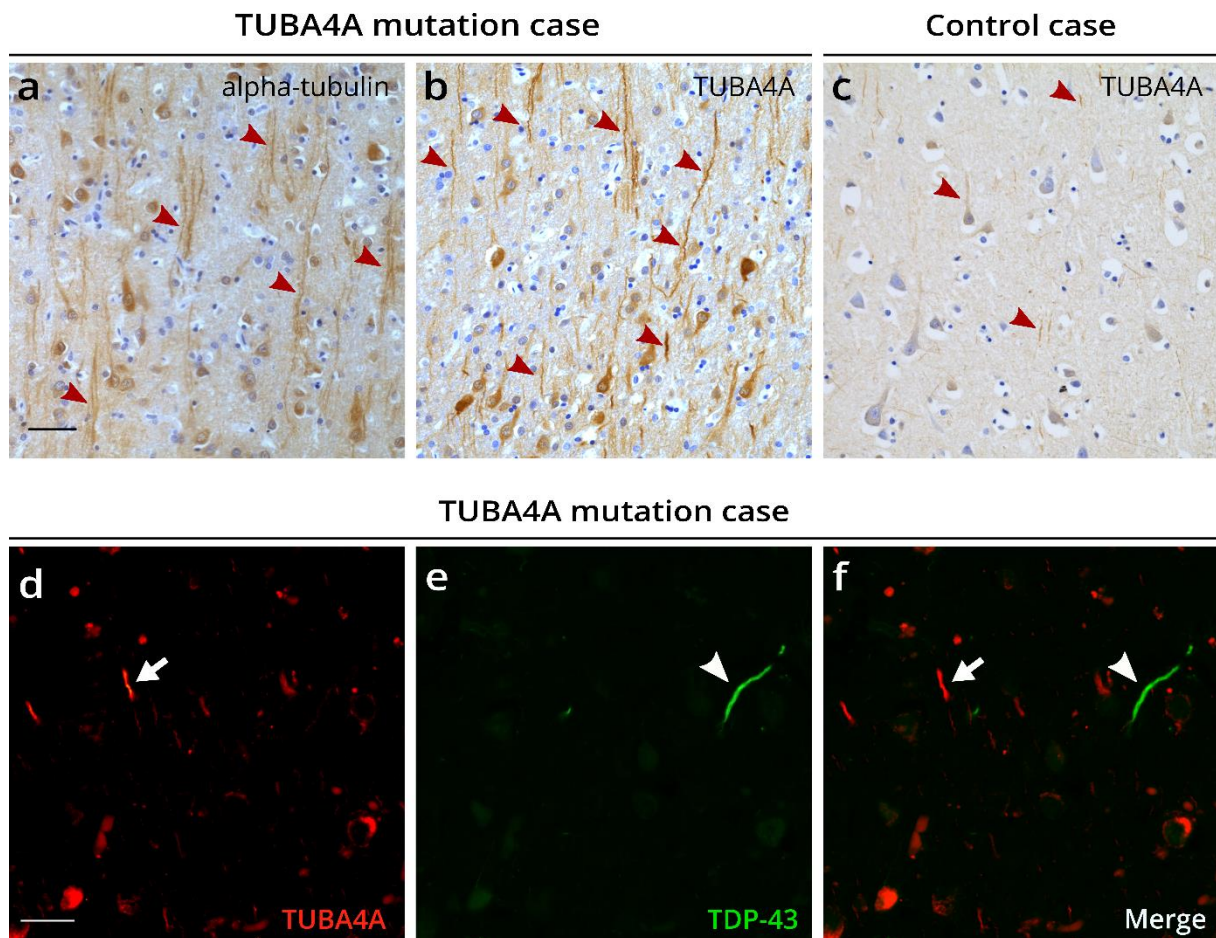

**Supplementary Figure S3. TUBA4A immunohistochemical analysis.** (a-c) Antibodies against alpha-tubulin (a) and TUBA4A (b) show a divergent staining in the R64Gfs\*90 *TUBA4A* mutation case with abnormal kinking of apical dendrites (arrows in a, b) compared to control cases (arrows in c) in the frontal cortex (layer V). (d-f) TUBA4A thickened neurites (arrow) and TDP-43 dystrophic neurites (arrowhead) do not co-localize in the frontal cortex (layer V) of the R64Gfs\*90 *TUBA4A* mutation case. Scale bars represent 50µm.

**Supplementary Table S1. Overview of the autopsy cases used for indicated experiments.** The table provides information regarding age (= age at death), sex, diagnosis, the presence of a genetic mutation, Braak NFT stage, A $\beta$ MTL phase, Braak LBD stage, PMI (hours) and RIN values. Case 1 is the R64Gfs\*90 *TUBA4A* mutation case. Control = non-neurodegenerative control, PMI = *post-mortem* interval, RIN = RNA integrity number, IHC = immunohistochemistry, WB = western blot, n.a. = not applicable.

| Case n° | Age | Sex | Diagnosis            | Genetic mutation        | Braak NFT stage | A $\beta$ MTL phase | Braak LBD stage | PMI | RIN | IHC/WB/qPCR   |
|---------|-----|-----|----------------------|-------------------------|-----------------|---------------------|-----------------|-----|-----|---------------|
| 1       | 60  | m   | FTLD-TDP Type C-like | <i>TUBA4A</i> R64Gfs*90 | 1               | 1                   | 0               | 12h | 4,5 | IHC, WB, qPCR |
| 2       | 69  | f   | FTLD-TDP Type C      | no                      | 1               | 0                   | 0               | 24h | -   | IHC, WB       |
| 3       | 62  | f   | FTLD-TDP Type C      | no                      | 0,5             | 0                   | 0               | 12h | -   | IHC, WB       |
| 4       | 79  | m   | FTLD-TDP Type B      | no                      | 1               | 0                   | 0               | 24h | -   | WB            |
| 5       | 64  | f   | FTLD-TDP Type A      | <i>GRN</i> IVS1+5G>C    | 1               | 0                   | 0               | 24h | -   | WB            |
| 6       | 35  | m   | Control              | n.a.                    | 0               | 0                   | 0               | 72h | -   | WB            |
| 7       | 74  | m   | Control              | n.a.                    | 0               | 0                   | 0               | 72h | -   | WB            |
| 8       | 55  | m   | Control              | n.a.                    | 0               | 0                   | 0               | 96h | -   | WB            |
| 9       | 61  | m   | Control              | n.a.                    | 0               | 0                   | 0               | 48h | 6,6 | WB, qPCR      |
| 10      | 54  | m   | Control              | n.a.                    | 1               | 0                   | 0               | 24h | 6,2 | WB, qPCR      |
| 11      | 74  | f   | Control              | n.a.                    | 1               | 0                   | 0               | 24h | 6,5 | IHC, qPCR     |

**Supplementary Table S2. Overview of the central nervous system regions of the R64Gfs\*90**

***TUBA4A* mutation case positive (+) or negative (-) for pTDP-43 pathological lesions.**

|                                 |   |                                    |   |
|---------------------------------|---|------------------------------------|---|
| Frontal cortex                  | + | Thalamus                           | + |
| Precentral cortex               | + | Basal nucleus of Meynert           | - |
| Postcentral cortex              | + | Amygdala                           | + |
| Parietal cortex                 | + | Midbrain - substantia nigra        | - |
| Temporal cortex                 | + | Midbrain - red nucleus             | - |
| Occipital cortex                | + | Midbrain - formatio reticularis    | + |
| Cingulate cortex                | + | Midbrain - central gray matter     | - |
| Entorhinal cortex               | + | Midbrain - colliculi inferior      | + |
| Hippocampus – CA region         | + | Midbrain - raphe nuclei            | - |
| Dentate gyrus                   | + | Pons - nuclei pontis               | + |
| Subiculum                       | + | Pons - locus coeruleus             | - |
| Insular cortex                  | + | Pons - parabrachial nucleus        | - |
| Basal ganglia - caudate nucleus | + | Medulla - vagal nerve nucleus      | - |
| Basal ganglia - claustrum       | + | Medulla - inferior olivary nucleus | - |
| Basal ganglia - globus pallidus | + | Medulla - hypoglossal nucleus      | - |
| Basal ganglia - putamen         | + | Cerebellum                         | - |
| Hypothalamus                    | + | Cervical spinal cord               | - |
